# Supplementary material
Source: PubMed Central journal article supplement (PMC6014892)
Supplement: NIHMS939435-supplement.pdf [file NIHMS939435-supplement.pdf]

## Opposite Molecular Signatures of Depression in Men and Women

### *Supplemental Information*

#### Supplementary Methods

##### Gene array data pre-processing

Microarrays were scanned and summarized by manufacturers' defaults. Data from Affymetrix arrays were processed by robust multi-array (RMA) method and data from Illumina arrays by manufacturer's BeadArray software for probe analysis. Batch effects were evaluated and normalized. Oligonucleotide probes (or probesets) were matched to gene symbols using hgu133plus2.db and illuminaHumanv4.db Bioconductor packages.

##### Individual study analysis

The individual study analysis to detect candidate marker genes involves two major components: random intercept model (RIM) and variable selection. In our previous publication, real data analysis and simulation showed improved statistical power and accuracy when applying the two techniques (1).

##### *Random intercept model (RIM)*

To account for the existence of several potential covariates, we applied a random intercept model (RIM). For a given gene  $g$ , we fit the model:

$$Y_{gik} = \mu_g + \beta_{g0}X_{0ik} + \sum_{l=1}^L \beta_{gl}X_{lik} + \alpha_k + \epsilon_{gik}.$$

In the model,  $Y_{gik}$  was the gene expression value of gene  $g$  ( $1 \leq g \leq G$ ) and disease status  $i$  ( $i=1$  for control and 2 for MDD) in sample pair  $k$  ( $1 \leq k \leq K$ ).  $X_{0ik}$  was the disease label (1

for MDD, 0 for control).  $X_{lik}$  represented values for potential confounding covariate  $l$  ( $1 \leq l \leq 7$ ; 0-1 binary for alcohol dependence, antidepressant drug use and death by suicide, and numerical for age, pH, RIN, and PMI).  $\alpha_k$  was the random intercept from a normal distribution with mean zero and variance  $\tau_g^2$ , which represented the deviation of averaged expression values in the  $k^{\text{th}}$  pair from the average of the whole population. Finally,  $\epsilon_{gik}$  were independent random noises that followed a normal distribution with mean zero and variance  $\sigma_g^2$ . Under this model,  $\beta_{g0}$  was the disease effect of gene  $g$  and represented the parameter of major interest. To obtain an MDD-associated differential expression list in each study, we used the likelihood ratio test to assess the p-values of testing  $H_0: \beta_{g0} = 0$  (vs  $H_A: \beta_{g0} \neq 0$ ). The p-values were then corrected for multiple comparisons using Benjamini-Hochberg procedure (2). We previously used simulation and real data to demonstrate that including the random effects  $\alpha_k$  improved the statistical power (1).

#### *Variable selection for RIM*

We have developed and evaluated a variable selection procedure in the random intercept model (namely, RIM\_BIC). At most 2 variables were included as covariates for each gene. Specifically, all possible RIM models that included at most two (i.e. 0, 1 or 2) clinical variables were computed and compared. The model with the smallest Bayesian Information Criterion (BIC) (3) value was selected. Here, different sets of covariates were included for each gene based on which covariates were most relevant. In other words, gene A might be confounded by alcohol and RIN, while gene B is confounded by antidepressant and pH. Similar to RIM model, likelihood ratio tests were used to generate p-values of testing  $H_0: \beta_{g0} = 0$  in each gene for the selected model by BIC.

## Meta-analysis of gene microarray studies

Random effects model (REM) is a popular method for combining effect sizes in meta-analysis.

$$d_{gk} = \mu_g + \alpha_{gk},$$

where  $d_{gk}$  is the standardized mean difference (effect size) for gene  $g$  ( $1 \leq g \leq G$ ) and study  $k$  ( $1 \leq k \leq K$ ), where  $G$  is total number of genes and  $K$  is total number of studies.

$\mu_g$  is true MDD effect for gene  $g$  and  $\alpha_{gk} \sim N(0, \tau_g^2)$ . The goal is to estimate  $\mu_g$ . (4)

described a procedure to combine effect sizes by inverse variance weighting, where the effect size was defined as the standardized mean difference  $d = (\bar{Y}_D - \bar{Y}_C)/S_p$ ,  $\bar{Y}_D$  and  $\bar{Y}_C$  were the means of MDD and control groups, respectively and  $S_p^2$  indicated an estimation

of the pooled variance. The estimated effect size  $\widehat{d}_{gk}$  can be estimated by the coefficient of MDD divided by its standard error (i.e.,  $\widehat{\beta}_{gk}/\widehat{\sigma}_{gk}$  from RIM model) from single study analysis. Denote the variance of  $\widehat{d}_{gk}$  as  $S_{gk}^2$ , which can be estimated using delta method.

Denote the between-study variance as  $\tau_g^2$  which can be estimated by the method of

moments suggested by DerSimonian and Larird (5):  $\widehat{\tau}_g^2 = \max\left\{0, \frac{Q_g - (K-1)}{S_{g1} - (S_{g2}/S_{g1})}\right\}$ , where

$$Q_g = \sum_k w_{gk} (\widehat{d}_{gk} - \mu_g)^2, \quad \mu_g = (\sum_k w_{gk} \widehat{d}_{gk}) / \sum w_{gk}, \quad w_{gk} = \widehat{S}_{gk}^{-2}, \quad S_{gr} = \sum_k w_{gk}^r. \quad \mu_g \text{ and}$$

variance of  $\mu_g$  could be estimated as  $\widehat{\mu}(\tau_g) = \frac{\sum (\widehat{S}_{gk}^2 + \widehat{\tau}_g^2)^{-1} \widehat{d}_{gk}}{\sum (\widehat{S}_{gk}^2 + \widehat{\tau}_g^2)^{-1}}$  and  $\text{Var}(\widehat{\mu}(\tau_g)) = \frac{1}{\sum (\widehat{S}_{gk}^2 + \widehat{\tau}_g^2)^{-1}}$ .

Under the assumption that the gene expression levels were normally distributed, a z-

score to test for differentially-expressed genes was constructed as,  $z_g = \frac{\widehat{\mu}(\tau_g)}{\sqrt{\text{Var}(\widehat{\mu}(\tau_g))}}$ , which

followed a normal distribution with zero mean and unit variance, under the null. The p-

values of each gene could be calculated and subsequent inferences could be made. We performed Pearson correlation to show the level of statistical agreement across studies. In males, we calculated the Pearson correlation between results from MD2\_ACC\_M and MD1\_ACC\_M (both Affy platform), with results represented by scatterplot (**Figure S2A**). In females, we calculated the Pearson correlation between results from MD2\_ACC\_F and MD3\_ACC\_F (one Affy platform, one Illumina platform), with results represented by scatterplot (**Figure S2B**).

#### *Meta-regression with variable selection (MetaRG\_BIC)*

In order to investigate the effect of sex in the random effect model, we adopted a meta-regression model adjusting sex as the only covariate.

$$d_{gk} = \mu_g + \beta_{gk}X_k + \alpha_{gk},$$

where  $\mu_g$  is true MDD effect for gene  $g$  and  $\alpha_{gk} \sim N(0, \tau_g^2)$ .  $X_k$  is the sex group indicator where  $X_k = 0$  denotes female group and  $X_k = 1$  denotes male group.  $\beta_{gk}$  denotes the sex effect and  $\beta_{gk} \neq 0$  indicates the MDD effect in male group and female groups are different. We adopt R package “metaphor” for the estimation procedure.

#### *Sex differences in gene expression in control subjects*

We adopted linear models to account for potential confounding covariates (Random Intercept Model). Each gene was fit to linear regression controlling for age, PMI, RIN, and pH. We then used stepwise regression to select the best model, using the covariate with the most significant effect for each gene. Using this model, each gene is tested for the covariate with the most effect on gene expression; that covariate is then used in the model for that gene. This method provides greater statistical power by only accounting for confounding variables that are relevant for each gene. The p-value for significance of the

sex effect is the p-value associated with the t statistic for the coefficient for sex. We then used Benjamini-Hochberg procedure for multiple comparisons within each study to control the false discovery rate (FDR) (2). We then used a q-value cutoff of 0.2 to identify genes that were sexually dimorphic in control subjects. We then asked whether the genes that were sexually dimorphic in controls were present in our meta-regression datasets and calculated the percent overlap.

### **Confirmation of meta-regression results – replication cohort**

We used recently published publicly available RNA-seq data generated using brains from a different brain bank (GEO GSE102556; (6)). Results were confirmed using data from two brain regions (BA11, BA25). We analyzed the effect of MDD separately in men and women. We adopted linear models to account for potential confounding covariates (Random Intercept Model). Each gene was fit to linear regression controlling for RIN, age, medication, and alcohol use (as in the manuscript describing this dataset (6)) In addition, we selected up to two additional covariates using stepwise regression to select the best model. Using this model, each gene is tested for the covariate with the greatest effect on gene expression; that covariate is then used in the model for that gene. This method provides greater statistical power by only accounting for confounding variables that are relevant for each gene. The p-value for significance of the MDD effect is the p-value associated with the t statistic for the coefficient for MDD. We then used a p-value cutoff of 0.05 to identify genes that were DE in MDD subjects (separately in men and women). We then assessed the overlap in DE gene identified in men and women and calculated the percent overlap as well as the percent of overlapping genes that were changed in

opposite directions in men and women with MDD.

### **Confirmation of meta-regression results – single gene analysis**

We confirmed our meta-regression results in two ways. First, since two of the ACC microarray studies (one in men, one in women) were performed at the same time, we could directly compare expression values in men and women. Second, we used qPCR in the AMY of samples obtained from both men and women (controls and MDD). Small qPCR products (80-150 base-pairs) for genes of interest (*ARPP21*, *P2RY12*, *MTHFR*) were amplified in triplicate on a BioRad CFX96 Touch Real-Time PCR Detection System using standard conditions defined by BioRad (95°C for 2 min followed by 40 cycles: 5s at 95°C, 30s at 60°C). cDNA was amplified in 20µl reactions using SsoAdvanced™ Universal SYBR® Green Supermix according to manufacturer's specifications (450µM primers; BioRad, Hercules, CA, USA). Primer dimers were assessed by amplifying primers without cDNA. Primers were retained if they produced no primer dimers or non-specific signal after 35 cycles and if the product size was as predicted. Results were calculated as the geometric mean of relative intensities compared to two internal control genes (glyceraldehyde-3-phosphate dehydrogenase (*GAPDH*) and cyclophilin G (*CYCLO*)). These housekeeping genes were previously shown not to be altered in MDD (7). qPCR primers are listed in **Table S8**. Both microarray expression and qPCR datasets were analyzed by 2-way ANCOVA using SPSS (SPSS, Inc., Chicago, IL, USA), with main effects of sex and diagnosis, and interaction of sex and diagnosis. The qPCR data were averaged over three replicates and transformed into arbitrary expression levels ( $2^{-\Delta Ct}$ ), with higher values representing greater expression. To determine relevant covariates to

include in the ANCOVA, Pearson correlation was used to assess the effect of age, postmortem interval, brain pH, RNA ratio, and RIN on gene expression. To determine relevant categorical covariates (alcohol abuse, antidepressant use, death by suicide), gene expression measurements were tested by ANOVA on only MDD subjects. For *ARPP21* array, age was used as a covariate in the ANCOVA. For *ARPP21* qPCR, RNA ratio was used as a covariate in the ANCOVA. For *P2RY12*, *MTHFR*, *SLCO1A2*, *ARHGEF3*, *GABRD*, *CAMK2B*, *CACNA1I*, *NOL1*, *NUB1*, and *PSMA3* array, no covariates were used in the ANCOVA. For *P2RY12* qPCR, RNA ratio, age, and PMI were used as covariates in the ANCOVA. For *MTHFR* qPCR, no covariates were used in the ANCOVA. Statistical significance was set at  $p < 0.05$ .

### **Rank-rank hypergeometric overlap (RRHO)**

RRHO is a threshold-free algorithm aiming to identify trends of overlap between two biological signatures defined as ranked lists of differential gene expression. We used RRHO to assess overlap in gene lists generated in men with MDD to gene lists generated in women with MDD. RRHO first ranks all genes based on DE p-values and effect size direction. Then, RRHO iterates through different thresholds of the ranked gene list for each dataset and defines “a candidate gene list” to be the amount of genes that are as extreme or more extreme than the current threshold of the same effect size direction. These procedures result in a matrix of hypergeometric p-values whose dimensions are the length of the ranked lists. The hypergeometric p-values are then (1) corrected for multiple comparisons by Benjamini and Yekutieli correction (8), (2)  $-\log_{10}$  transformed, and (3) visualized in the heatmap, with each pixel of the heatmap representing an overlap

between two candidate gene lists. Note that in the method described above, we count the candidate gene list to be as extreme or more extreme of the same effect size direction (either top to middle or bottom to middle for a ranked gene list), which is slightly different from the original algorithm (9), where they always count the candidate gene list in the same direction (i.e., overlap in genes changed in the same direction). This approach was particularly relevant for our investigations, as we were interested in overlap in genes that were changed in opposite directions in men and women with MDD. We further split the heatmap into four quadrants using inner boundaries where the effect size direction of the ranked gene list alters. Under this scenario, all four quadrants of the hypergeometric heatmap are biologically meaningful.

### **Cell-type specific analysis using a mouse dataset**

A secondary source of single cell expression data assayed neural cells from mice of both sexes (10). Expression data (number of molecules per cell) was obtained from the Linnarsson lab website ([https://storage.googleapis.com/linnarsson-lab-www-blobs/blobs/cortex/expression\\_mRNA\\_17-Aug-2014.txt](https://storage.googleapis.com/linnarsson-lab-www-blobs/blobs/cortex/expression_mRNA_17-Aug-2014.txt)). This dataset assayed 3005 cells from the somatosensory (S1) cortex and hippocampus. We used the provided BackSPIN clustering that marked cells as one of 7 major classes ('level1class' in data file) and 47 cell subclasses. We log transformed the provided molecule counts plus one. For each gene, these log scaled values were standardized across all cells. Cells were then grouped by provided 47 subclasses and the average standardized expression value was calculated for each gene. Genes with average standardized expression levels higher than two standard deviations in a given subclass were considered cell-type enriched. The



area under the receiver operating curve (AUROC) statistic was used to measure enrichment of these cell subclass enriched gene lists. The provided cell-type identities or subclasses in the Zeisel dataset was permuted to determine the empirical p-values of the AUROCs (10,000 random assignments of cell subclasses). False discovery rate was used to correct for multiple tests.

## Supplementary Figures

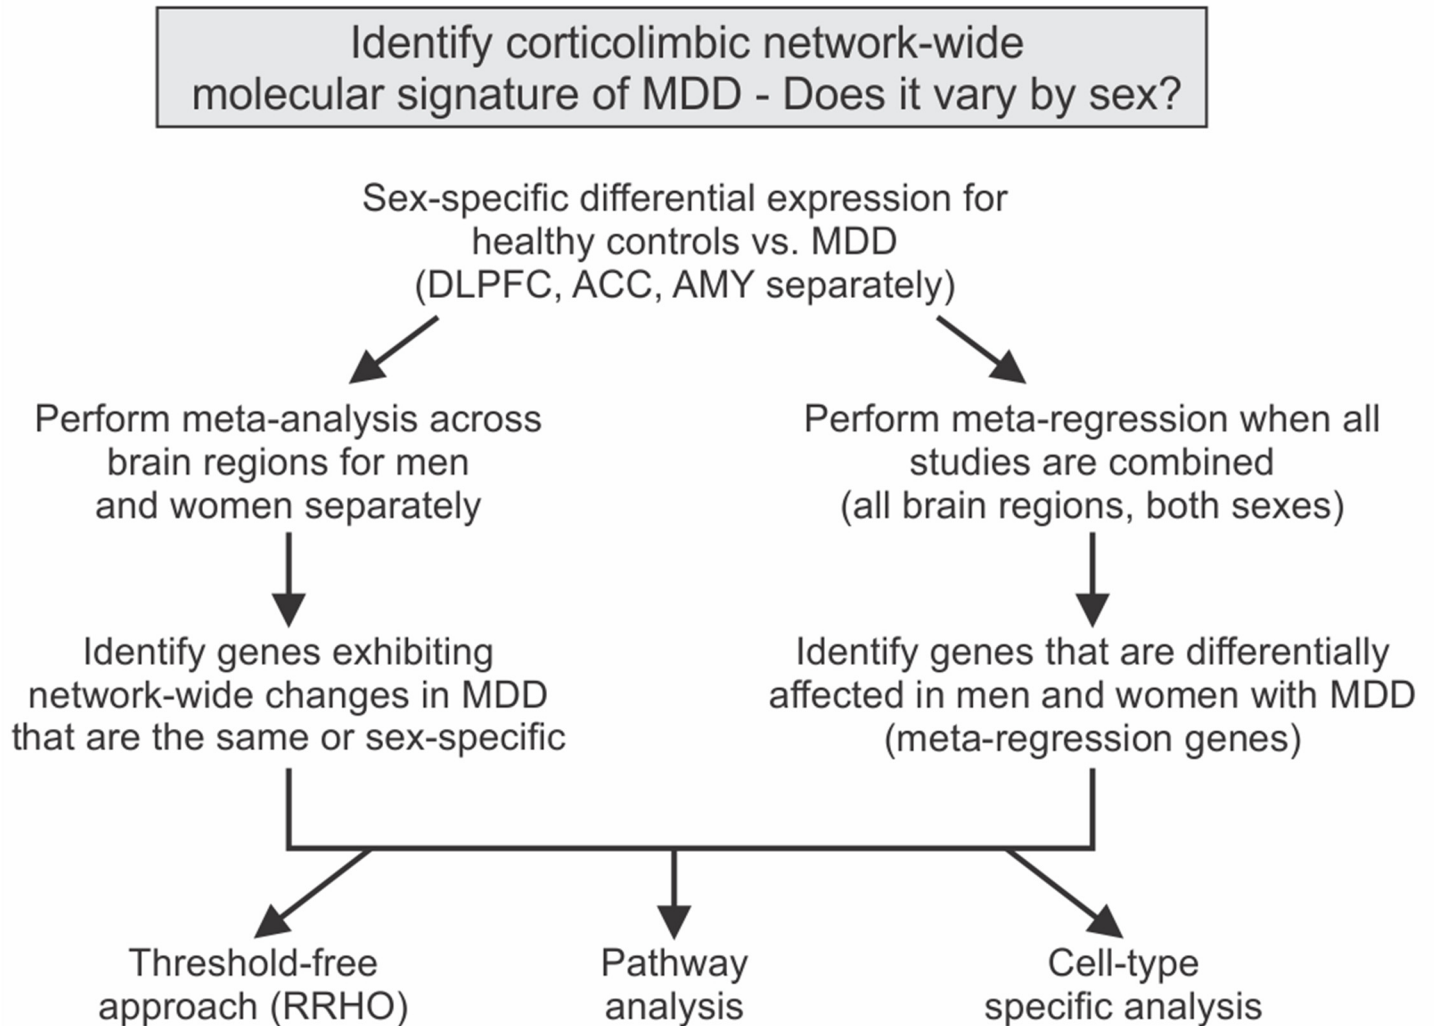

**Figure S1. Overview of experimental design for meta-analysis, meta-regression, and downstream analyses.**

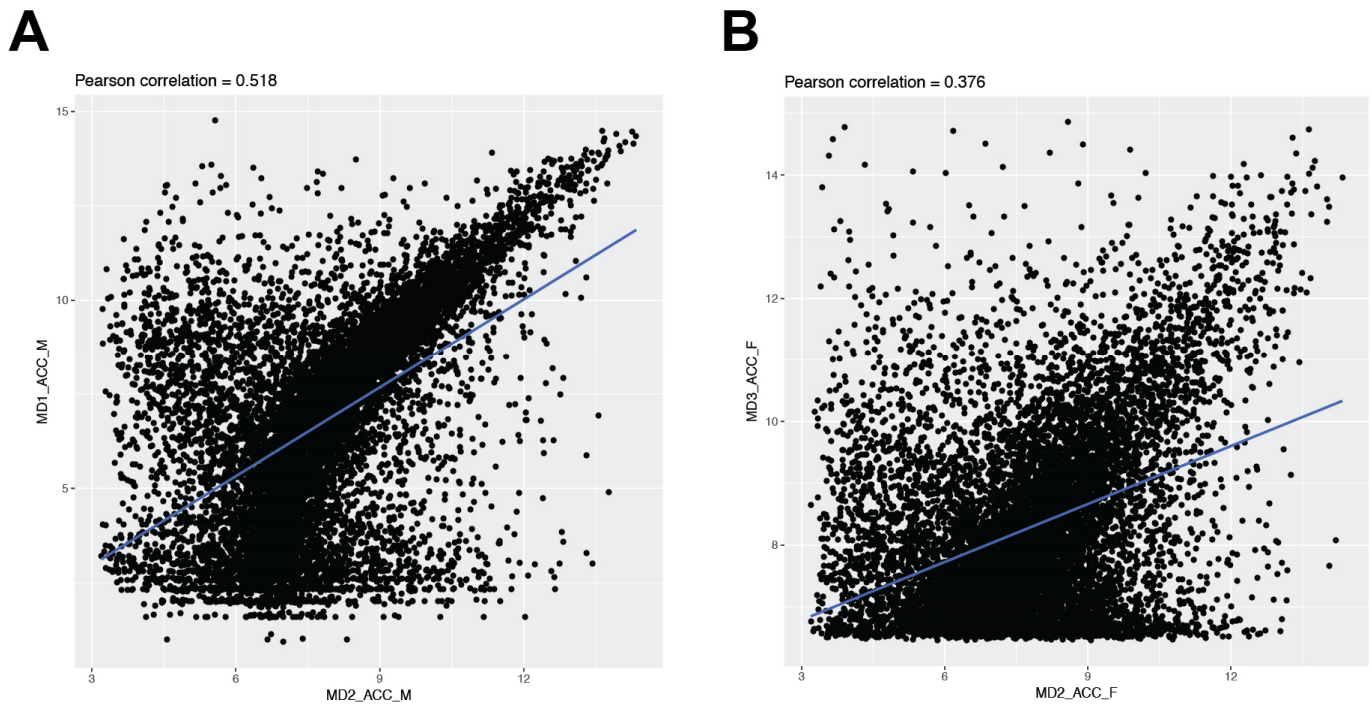

**Figure S2. Correlation of gene expression across studies used in meta-analysis.** (A) In ACC studies performed in males on the same Affymetrix platform, there was a significant correlation of gene expression (Pearson correlation = 0.518). Results are shown by scatterplot. (B) In ACC studies performed in females on different platforms (Affymetrix and Illumina), there was a significant correlation of gene expression (Pearson correlation = 0.376). Results are shown by scatterplot.

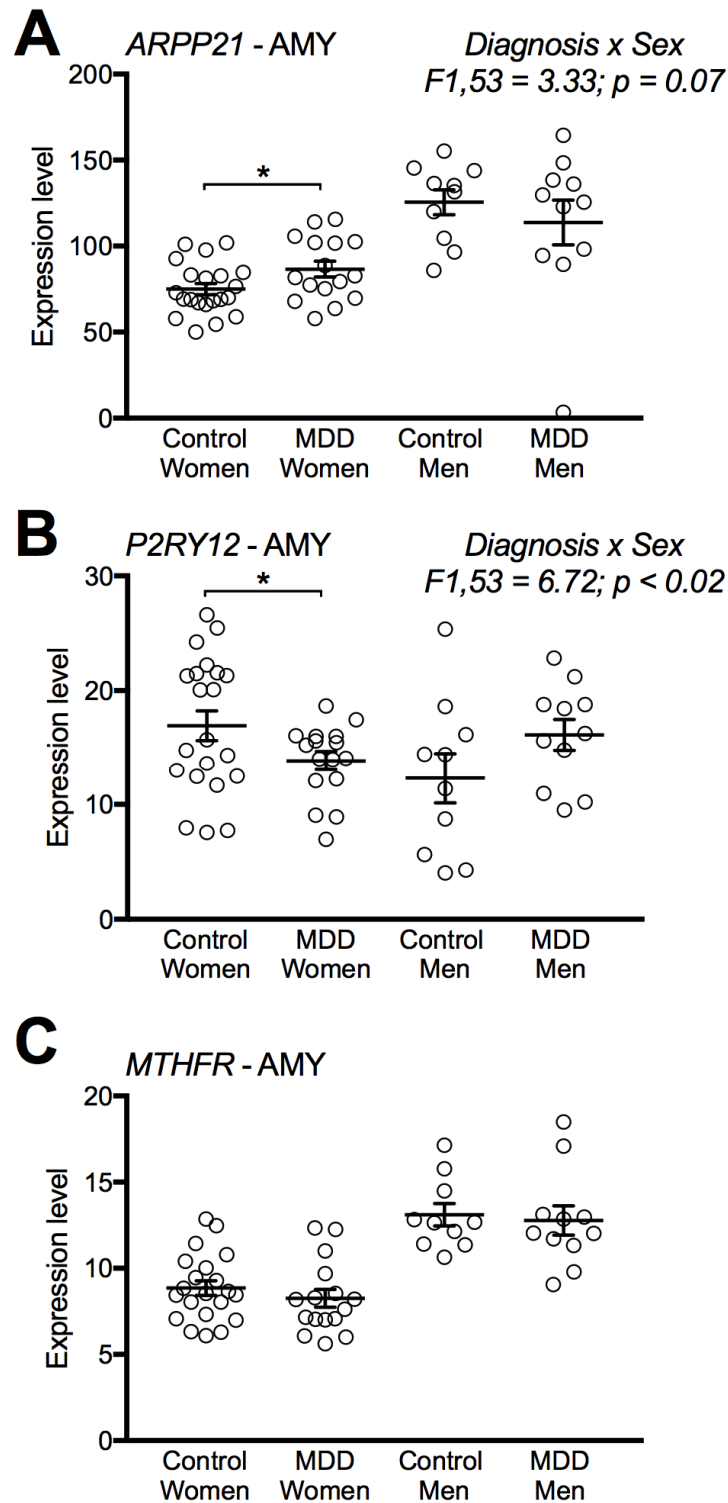

**Figure S3. Verification of meta-regression results using qPCR in AMY.** There were sex x diagnosis interactions for *ARPP21* (A) and *P2RY12* (B), but not for *MTHFR* (C). For *ARPP21* (A), there was a significant increase in expression in only women with MDD. For *P2RY12* (B), there was a significant decrease in expression in only women with MDD. \*,  $p < 0.05$ .

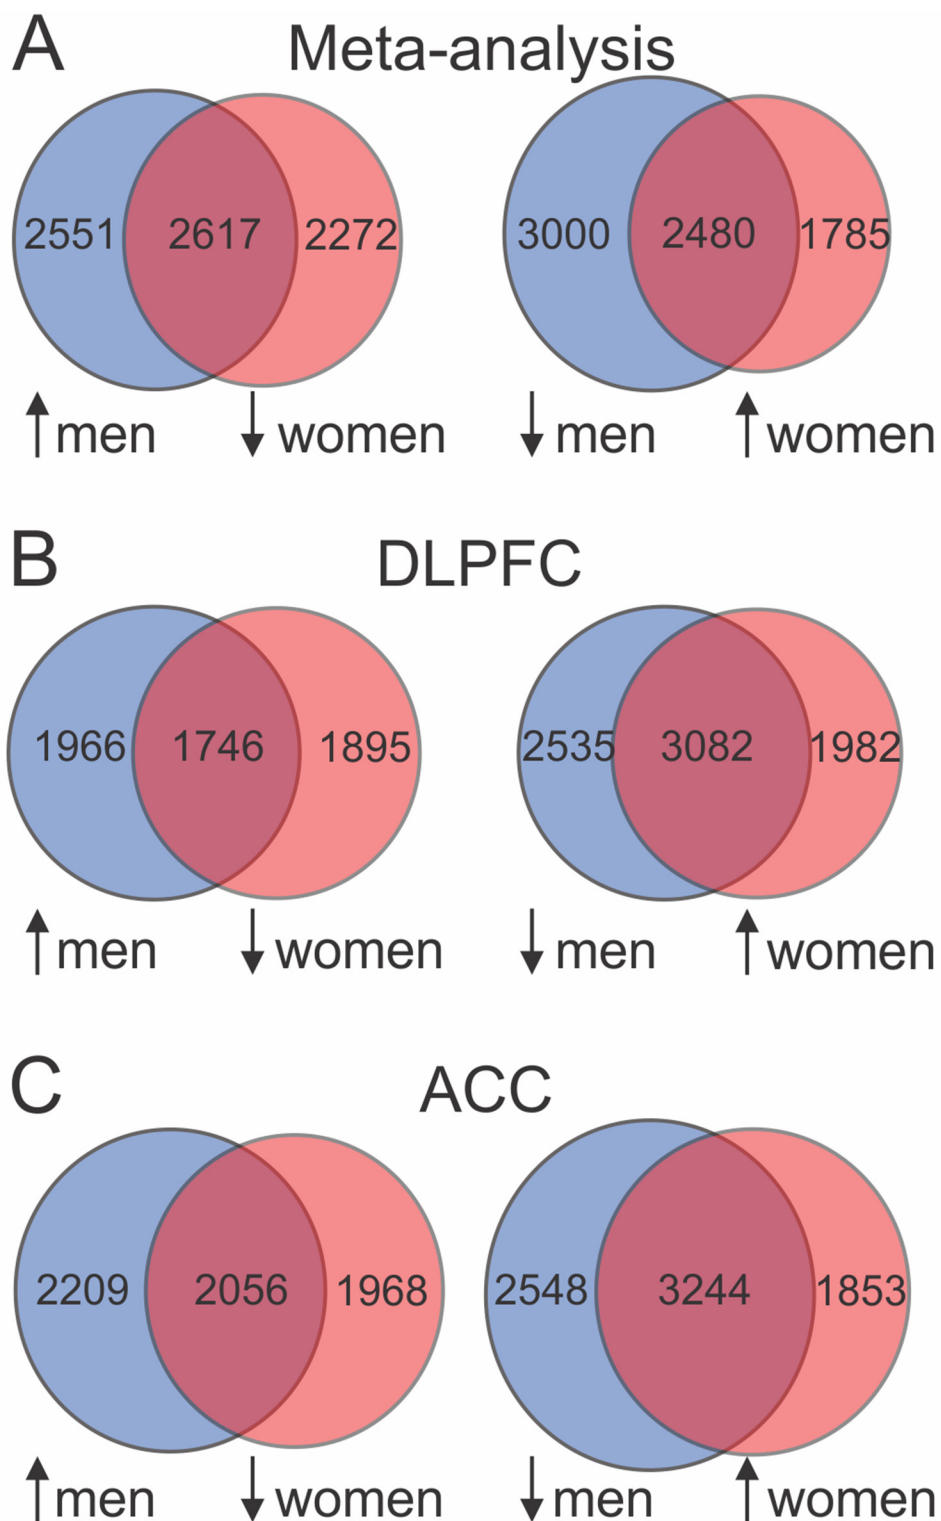

**Figure S4. Overlap in opposite molecular profiles in men and women with MDD. (A)** Venn diagrams indicating overlap in RRHO-identified genes from the full meta-analysis. **(B)** Venn diagrams indicating overlap in RRHO-identified genes from the DLPFC. **(C)** Venn diagrams indicating overlap in RRHO-identified genes from the ACC.

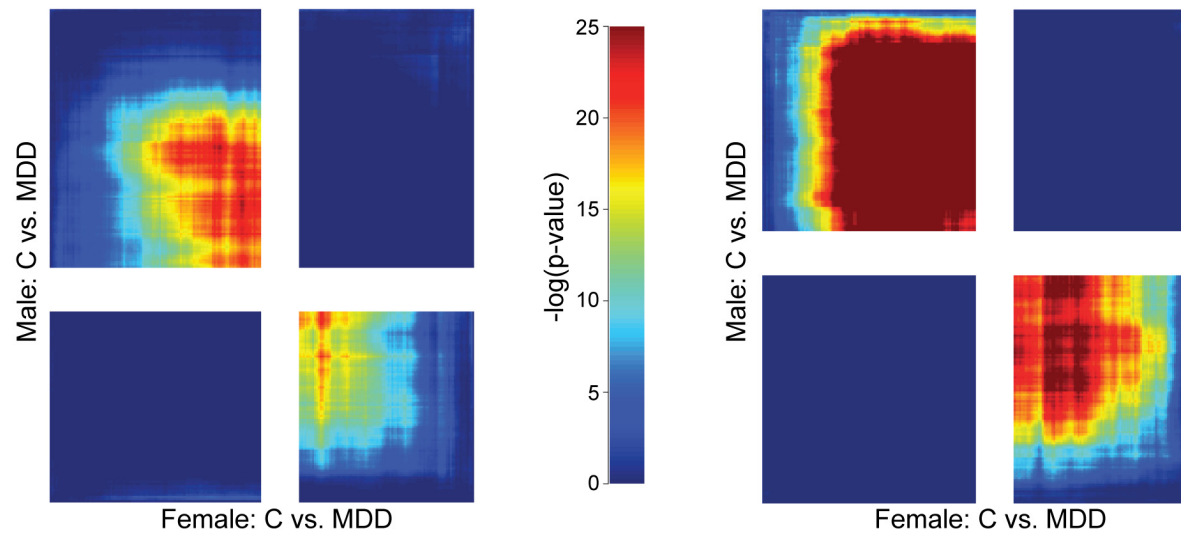

**Figure S5.** RRHO analysis of replication dataset from Labonte et al. (6) confirmed the opposite transcriptional profile of male and female depression in BA25 (**left**) and BA11 (**right**).

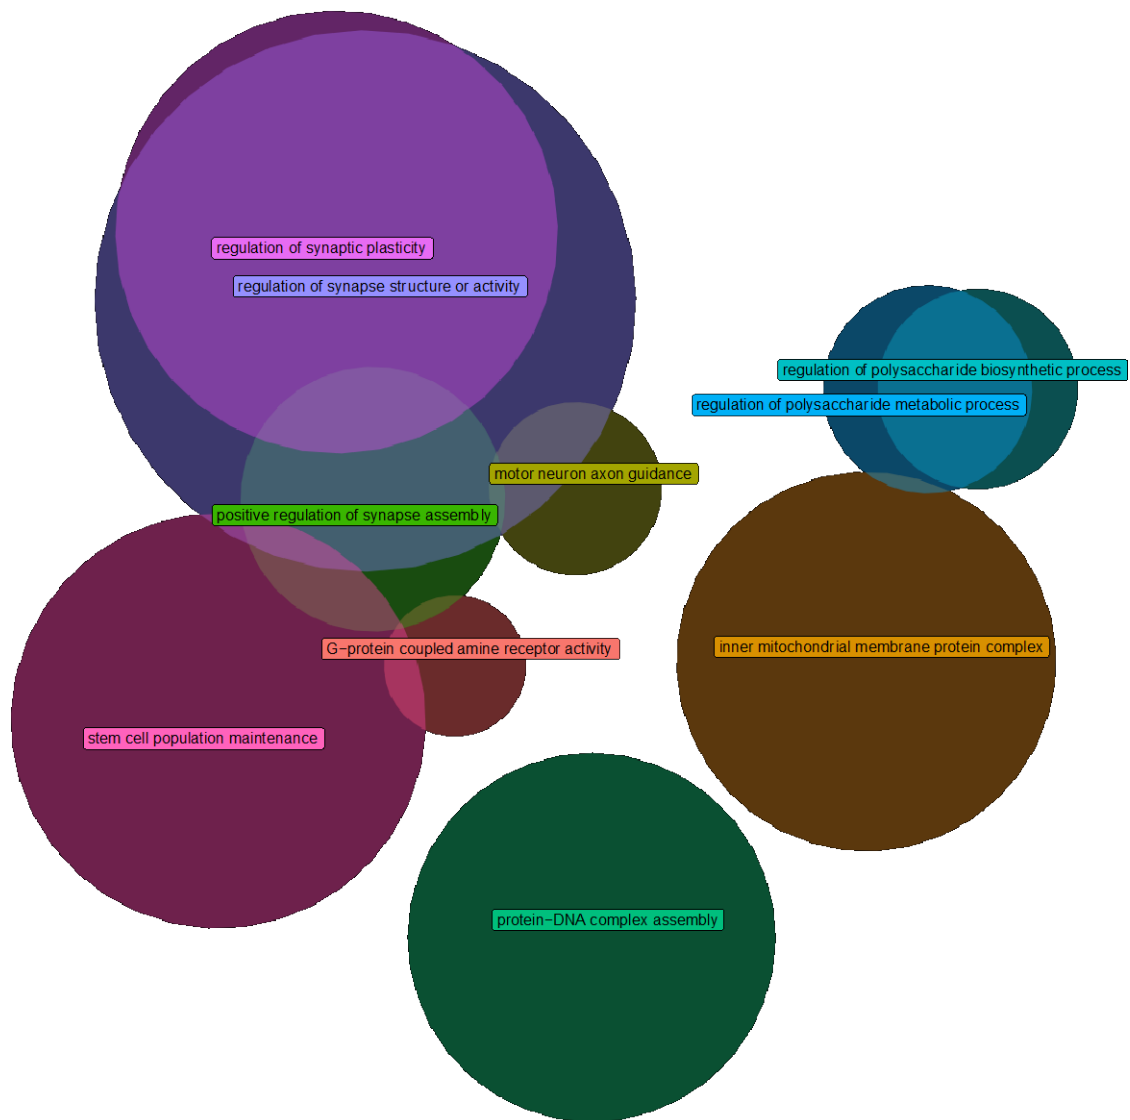

**Figure S6. Overlap of top 10 biological pathways identified in men with MDD. Note the high level of overlap in the synapse-related pathways.**

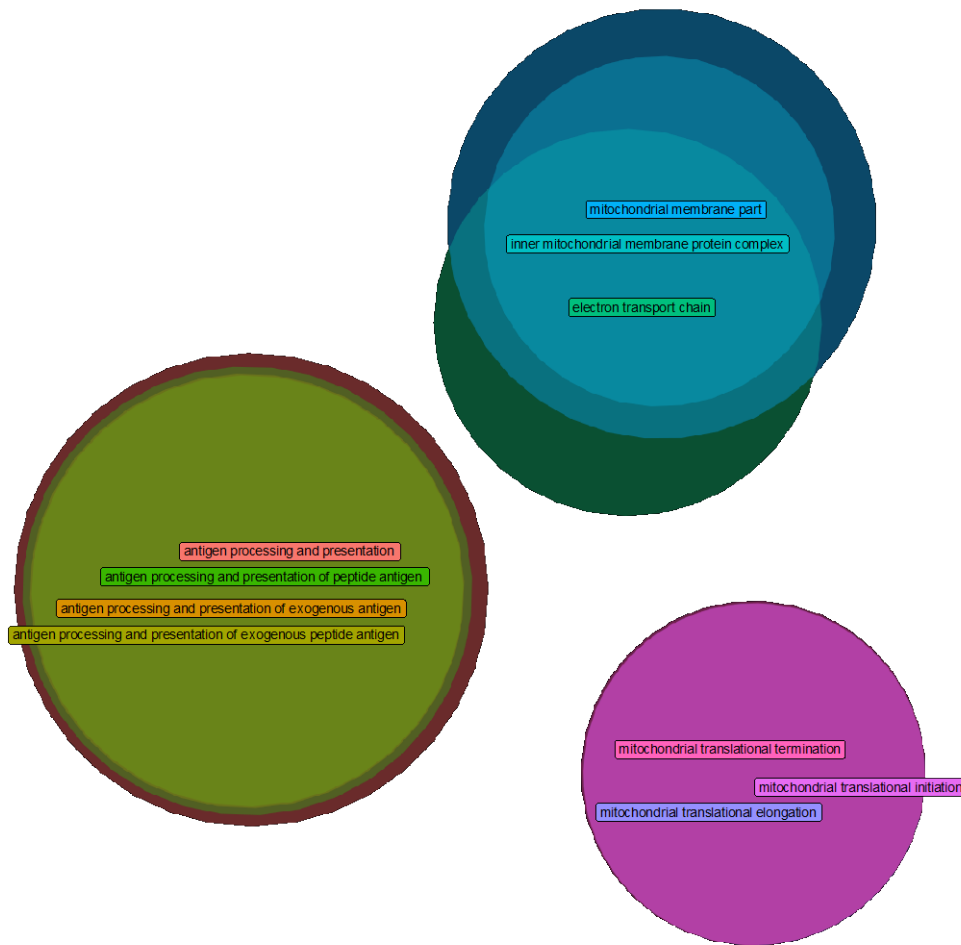

**Figure S7. Overlap of top 10 biological pathways identified in women with MDD.** Note the high level of overlap in the antigen-related pathways. Additionally, the mitochondrial translation-related pathways overlapped with each other, but not with the mitochondrial membrane-related pathways.



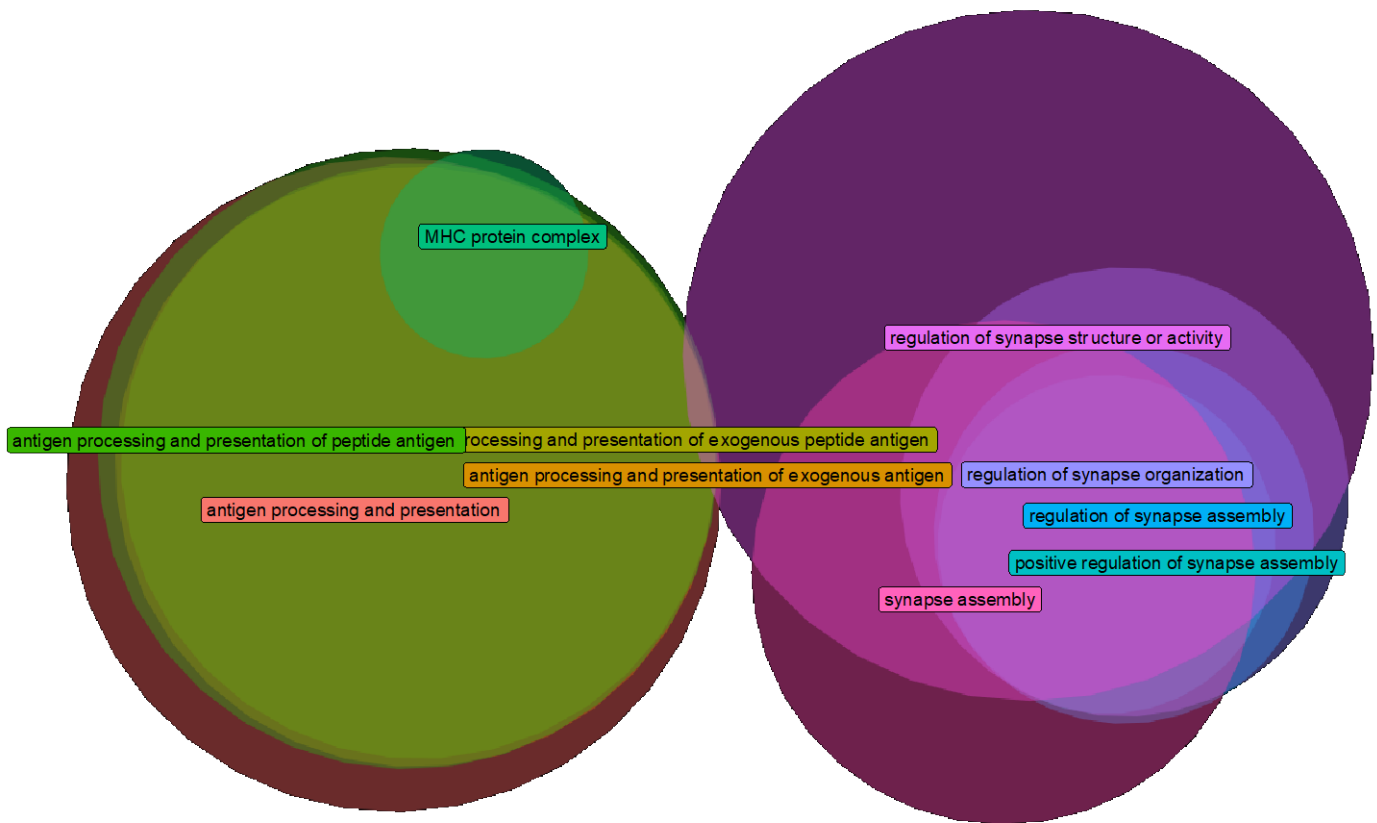

**Figure S8. Overlap of top 10 biological pathways identified in the meta-regression dataset.** Note the high level of overlap in the antigen-related and MHC pathways. Additionally, the synapse-related pathways are also highly overlapping.

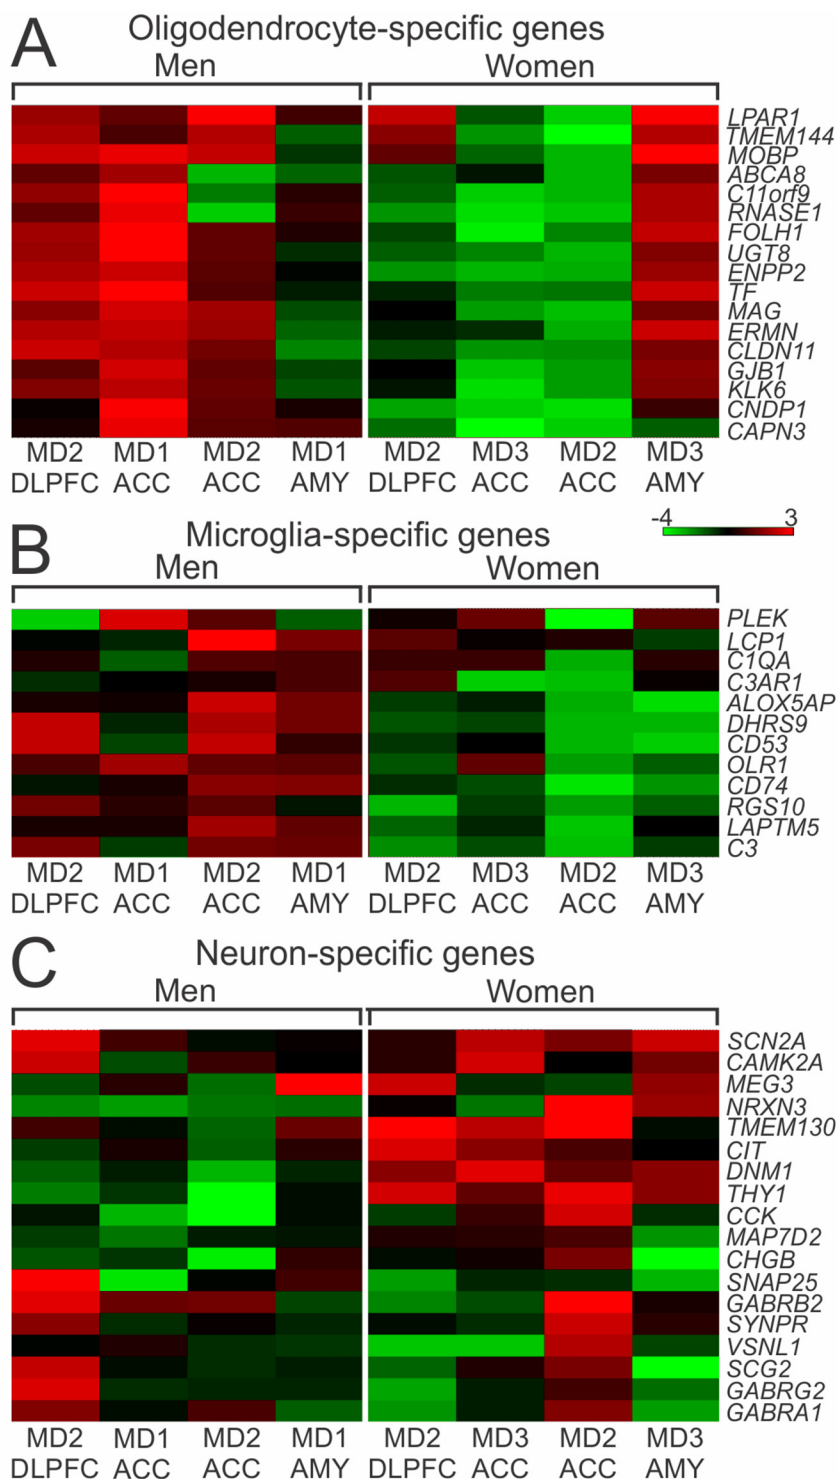

**Figure S9. Cell type-specific changes in MDD. (A)** There were sex-specific and brain region-specific changes in oligodendrocyte genes. The overall cell type-specific signal when all three brain regions were combined indicated upregulation of oligodendrocyte-specific genes in men with MDD and downregulation of these same genes in women with MDD. This finding was driven by the DLPFC and ACC, with opposite direction of effects

in AMY. **(B)** Across all three brain regions, there were increases in microglia-specific genes in men with MDD, but decreases in these same genes in women with MDD. **(C)** Across brain regions, there were consistent decreases in neuron-specific genes in men with MDD. There were nonsignificant increases in these same neuron-specific genes in women with MDD.

**Table S1. Description of eight MDD microarray studies, including data pre-processing and number of genes investigated.** See also previous reports on the cohorts and datasets (11-14).

| Study name   | Sex    | Brain region | Sample size   | Array platform       | # genes before matching | # genes after matching | # genes in common | # genes after filtering                              |
|--------------|--------|--------------|---------------|----------------------|-------------------------|------------------------|-------------------|------------------------------------------------------|
| 1-MD_ACC_M   | Male   | ACC          | 32 (16 pairs) | Affy. HG-U133 Plus 2 | 40610                   | 19621                  | 16689             | 10680 genes<br>(20%MV; 20%SD)<br>= 16689 x 0.8 x 0.8 |
| 2-MD_ACC_M   | Male   | ACC          | 18 (9 pairs)  | Affy. HG-U133 Plus 2 | 53596                   | 19572                  |                   |                                                      |
| 3-MD_ACC_F   | Female | ACC          | 26 (13 pairs) | Affy. HG-U133 Plus 2 | 53596                   | 19572                  |                   |                                                      |
| 4-MD_ACC_F   | Female | ACC          | 40 (20 pairs) | IlluminaHumanHT-12   | 48803                   | 25159                  |                   |                                                      |
| 5-MD_AMY_M   | Male   | AMY          | 28 (14 pairs) | Affy. HG-U133 Plus 2 | 40610                   | 19621                  |                   |                                                      |
| 6-MD_AMY_F   | Female | AMY          | 40 (20 pairs) | IlluminaHumanHT-12   | 48803                   | 25159                  |                   |                                                      |
| 7-MD_DLPFC_M | Male   | DLPFC        | 28 (14 pairs) | Affy. HG-U133 Plus 2 | 53596                   | 19572                  |                   |                                                      |
| 8-MD_DLPFC_F | Female | DLPFC        | 30 (15 pairs) | Affy. HG-U133 Plus 2 | 53596                   | 19572                  |                   |                                                      |

**Table S2.** Demographic and technical details on individual subjects included in each microarray study.

| Hu#  | Subject Group | DSM-IV Diagnosis | MOD        | COD                        | Sex | Age | Race | PMI  | pH  | RNA ratio | RIN | Medication ATOD | Tobacco ATOD | 1-MD1-ACC-M | 2-MD2-ACC-M | 3-MD2-ACC-F | 4-MD3-ACC-F | 5-MD1-AMY-M | 6-MD3-AMY-F | 7-MD2-DLPFC-M | 8-MD2-DLPFC-F |
|------|---------------|------------------|------------|----------------------------|-----|-----|------|------|-----|-----------|-----|-----------------|--------------|-------------|-------------|-------------|-------------|-------------|-------------|---------------|---------------|
| 615  | Control       | None             | Natural    | Ruptured abdominal aortic  | M   | 62  | W    | 7.2  | 6.4 | 1.35      | 7.8 | N               | N            | 1           |             |             |             | 1           |             | 1             |               |
| 789  | Control       | None             | Accidental | Asphyxiation               | M   | 22  | W    | 20.1 | 7.0 | 2.00      | 7.8 | N               | N            | 1           |             |             |             | 1           |             | 1             |               |
| 795  | Control       | None             | Natural    | Ruptured abdominal aortic  | M   | 68  | W    | 11.8 | 6.8 | 1.60      | 8.2 | N               | N            | 1           |             |             |             | 1           |             | 1             |               |
| 1031 | Control       | None             | Natural    | ASCVD                      | M   | 53  | W    | 23.2 | 6.8 | 1.50      | 8.9 | N               | N            | 1           | 1           |             |             | 1           |             | 1             |               |
| 604  | Control       | None             | Natural    | Hypoplastic coronary       | M   | 39  | W    | 19.3 | 7.1 | 2.11      | 8.6 | N               | N            | 1           |             |             |             | 1           |             |               |               |
| 685  | Control       | None             | Natural    | Hypoplastic coronary       | M   | 56  | W    | 14.5 | 7.1 | 1.70      | 8.1 | O               | U            | 1           |             |             |             | 1           |             |               |               |
| 713  | Control       | None             | Natural    | ASCVD                      | M   | 58  | W    | 37.5 | 7.0 | 1.55      | 8.4 | U               | Y            | 1           |             |             |             | 1           |             |               |               |
| 736  | Control       | None             | Natural    | ASCVD                      | M   | 54  | W    | 15.5 | 6.9 | 1.56      | 8.3 | N               | N            | 1           |             |             |             | 1           |             |               |               |
| 852  | Control       | None             | Natural    | Cardiac tamponade          | M   | 54  | W    | 8.0  | 6.9 | 1.79      | 9.1 | N               | Y            | 1           |             |             |             | 1           |             |               |               |
| 857  | Control       | None             | Natural    | ASCVD                      | M   | 48  | W    | 16.6 | 6.7 | 2.03      | 8.9 | N               | Y            | 1           |             |             |             | 1           |             |               |               |
| 1047 | Control       | None             | Natural    | ASCVD                      | M   | 43  | W    | 13.8 | 6.6 | 1.83      | 9.0 | O               | N            | 1           |             |             |             | 1           |             |               |               |
| 1067 | Control       | None             | Natural    | Hypertensive heart         | M   | 49  | W    | 6.0  | 6.6 | 1.44      | 8.2 | O               | N            | 1           |             |             |             | 1           |             |               |               |
| 1086 | Control       | None             | Natural    | ASCVD                      | M   | 51  | W    | 24.2 | 6.8 | 1.36      | 8.1 | N               | Y            | 1           |             |             |             | 1           |             |               |               |
| 1122 | Control       | None             | Natural    | Cardiac tamponade          | M   | 55  | W    | 15.4 | 6.7 | 1.40      | 7.9 | O               | Y            | 1           |             |             |             | 1           |             |               |               |
| 546  | Control       | None             | Natural    | ASCVD                      | F   | 37  | W    | 23.5 | 6.7 | 2.00      | 8.6 | U               | U            |             |             | 1           |             |             | 1           |               | 1             |
| 567  | Control       | None             | Natural    | Mitral valve prolapse      | F   | 46  | W    | 15.0 | 6.8 | 2.30      | 8.9 | N               | U            |             |             | 1           |             |             | 1           |               | 1             |
| 575  | Control       | None             | Natural    | ASCVD                      | F   | 55  | B    | 11.3 | 6.8 | 1.80      | 9.6 | U               | U            |             |             | 1           |             |             | 1           |               | 1             |
| 1034 | Control       | None             | Natural    | Endocardial fibroelastosis | F   | 23  | W    | 8.5  | 7.0 | 2.00      | 7.8 | N               | N            |             |             | 1           |             |             | 1           |               | 1             |
| 1092 | Control       | None             | Natural    | Mitral valve prolapse      | F   | 40  | B    | 16.6 | 6.8 | 1.70      | 8.0 | O               | N            |             |             | 1           |             |             | 1           |               | 1             |
| 1247 | Control       | None             | Natural    | ASCVD                      | F   | 58  | W    | 22.7 | 6.4 | 1.30      | 8.4 | O               | N            |             |             | 1           |             |             | 1           |               | 1             |

| Hu#       | Subject Group | DSM-IV Diagnosis                                                                 | MOD        | COD                     | Sex | Age | Race | PMI  | pH  | RNA ratio | RIN | Medication ATOD | Tobacco ATOD | 1-MD1-ACC-M | 2-MD2-ACC-M | 3-MD2-ACC-F | 4-MD3-ACC-F | 5-MD1-AMY-M | 6-MD3-AMY-F | 7-MD2-DLPFC-M | 8-MD2-DLPFC-F |
|-----------|---------------|----------------------------------------------------------------------------------|------------|-------------------------|-----|-----|------|------|-----|-----------|-----|-----------------|--------------|-------------|-------------|-------------|-------------|-------------|-------------|---------------|---------------|
| 1282      | Control       | None                                                                             | Natural    | ASCVD                   | F   | 39  | W    | 24.5 | 6.8 | 1.30      | 7.5 | N               | N            |             |             | 1           |             |             | 1           |               | 1             |
| 1391      | Control       | None                                                                             | Natural    | ASCVD                   | F   | 51  | W    | 7.80 | 6.6 | 1.60      | 7.1 | O               | Y            |             |             | 1           |             |             | 1           |               | 1             |
| 1403      | Control       | Adjustment disorder with mixed anxiety & depressed mood, in remission (8 months) | Natural    | ASCVD                   | F   | 45  | W    | 12.3 | 6.7 | 1.80      | 8.2 | O               | Y            |             |             | 1           |             |             | 1           |               | 1             |
| 1466      | Control       | None                                                                             | Accidental | Trauma                  | F   | 64  | B    | 20.0 | 6.7 | 2.00      | 8.8 | O               | N            |             |             | 1           |             |             | 1           |               | 1             |
| 1196      | Control       | None                                                                             | Accidental | Asphyxiation            | F   | 36  | W    | 14.5 | 6.4 | 1.80      | 8.2 | O               | N            |             |             |             | 1           |             | 1           |               | 1             |
| 568       | Control       | None                                                                             | Natural    | ASCVD                   | F   | 60  | W    | 9.5  | 6.9 | 1.90      | 8.7 | N               | U            |             |             |             | 1           |             | 1           |               | 1             |
| 627       | Control       | None                                                                             | Natural    | COPD                    | F   | 43  | B    | 14.1 | 7.1 | 1.00      | 7.0 | O               | N            |             |             |             | 1           |             | 1           |               |               |
| 818       | Control       | None                                                                             | Accidental | Anaphylactic reaction   | F   | 67  | W    | 24.0 | 7.1 | 1.50      | 8.4 | O               | N            |             |             |             | 1           |             | 1           |               |               |
| 840       | Control       | Adjustment disorder with depressed mood, current; AAR (20 years remission)       | Natural    | ASCVD                   | F   | 41  | W    | 15.4 | 6.8 | 2.00      | 9.1 | N               | Y            |             |             |             | 1           |             | 1           |               |               |
| 1081      | Control       | AAR (20 years remission)                                                         | Natural    | COPD                    | F   | 57  | W    | 14.9 | 6.8 | 1.80      | 9.0 | B<br>O          | N            |             |             |             | 1           |             | 1           |               |               |
| 1099      | Control       | None                                                                             | Natural    | Cardiomyopathy          | F   | 24  | W    | 9.1  | 6.5 | 1.90      | 8.6 | O               | Y            |             |             |             | 1           |             | 1           |               |               |
| 1280      | Control       | None                                                                             | Natural    | Pulmonary               | F   | 50  | W    | 23.5 | 6.7 | 1.30      | 7.7 | U               | U            |             |             |             | 1           |             | 1           |               |               |
| 1355      | Control       | None                                                                             | Natural    | Subarachnoid hemorrhage | F   | 74  | W    | 24.9 | 6.6 | 1.90      | 7.0 | O               | N            |             |             |             | 1           |             | 1           |               |               |
| 1001<br>3 | Control       | None                                                                             | Accidental | Trauma                  | F   | 16  | W    | 9.3  | 6.7 | 1.80      | 9.0 | O               | N            |             |             |             | 1           |             | 1           |               |               |
| 1129      | Control       | None                                                                             | Natural    | ASCVD                   | M   | 54  | W    | 21.0 | 6.8 | 1.50      | 9.0 | N               | N            |             | 1           |             |             |             |             |               | 1             |
| 1317      | Control       | None                                                                             | Natural    | ASCVD                   | M   | 56  | W    | 22.9 | 6.5 | 1.20      | 8.8 | O               | Y            |             | 1           |             |             |             |             |               | 1             |
| 1372      | Control       | None                                                                             | Accidental | Asphyxiation            | M   | 37  | W    | 20.5 | 6.6 | 1.60      | 9.0 | O               | U            |             | 1           |             |             |             |             |               | 1             |

| Hu#  | Subject Group | DSM-IV Diagnosis                                            | MOD        | COD                     | Sex | Age | Race | PMI  | pH  | RNA ratio | RIN | Medication ATOD | Tobacco ATOD | 1-MD1-ACC-M | 2-MD2-ACC-M | 3-MD2-ACC-F | 4-MD3-ACC-F | 5-MD1-AMY-M | 6-MD3-AMY-F | 7-MD2-DLPFC-M | 8-MD2-DLPFC-F |
|------|---------------|-------------------------------------------------------------|------------|-------------------------|-----|-----|------|------|-----|-----------|-----|-----------------|--------------|-------------|-------------|-------------|-------------|-------------|-------------|---------------|---------------|
| 1394 | Control       | None                                                        | Natural    | ASCVD                   | M   | 45  | W    | 17.3 | 6.6 | 1.90      | 7.3 | N               | N            |             | 1           |             |             |             |             | 1             |               |
| 1439 | Control       | None                                                        | Natural    | Subarachnoid hemorrhage | M   | 56  | W    | 16.1 | 6.8 | 2.10      | 7.7 | O               | Y            |             | 1           |             |             |             |             | 1             |               |
| 1444 | Control       | None                                                        | Natural    | Pulmonary               | M   | 46  | W    | 22.0 | 6.5 | 2.10      | 8.4 | N               | N            |             | 1           |             |             |             |             | 1             |               |
| 1462 | Control       | None                                                        | Natural    | ASCVD                   | M   | 47  | W    | 17.2 | 6.6 | 2.00      | 8.5 | N               | N            |             | 1           |             |             |             |             | 1             |               |
| 612  | Control       | None                                                        | Accidental | Aspiration              | M   | 60  | W    | 9.6  | 6.8 | 1.50      | 9.0 | N               | U            |             |             |             |             |             |             | 1             |               |
| 1214 | Control       | None                                                        | Natural    | ASCVD                   | M   | 57  | W    | 16.4 | 6.4 | 1.70      | 7.5 | O               | N            |             |             |             |             |             |             | 1             |               |
| 1447 | Control       | None                                                        | Natural    | ASCVD                   | M   | 51  | W    | 16.2 | 6.5 | 1.80      | 8.5 | N               | N            |             |             |             |             |             |             | 1             |               |
| 686  | Control       | None                                                        | Natural    | ASCVD                   | F   | 52  | W    | 22.6 | 7.1 | 1.90      | 8.5 | O               | Y            |             |             | 1           |             |             |             |               | 1             |
| 731  | Control       | None                                                        | Natural    | ASCVD                   | F   | 63  | W    | 10.5 | 6.8 | 1.60      | 8.2 | N               | Y            |             |             | 1           |             |             |             |               | 1             |
| 1293 | Control       | None                                                        | Accidental | Trauma                  | F   | 65  | W    | 18.5 | 6.6 | 1.30      | 7.0 | N               | N            |             |             | 1           |             |             |             |               | 1             |
| 1270 | Control       | None                                                        | Accidental | Trauma                  | F   | 73  | W    | 19.7 | 6.7 | 1.40      | 7.7 | O               | N            |             |             | 1           |             |             |             |               | 1             |
| 634  | Control       | None                                                        | Natural    | ASCVD                   | M   | 52  | W    | 16.2 | 7.0 | 1.90      | 8.5 | N               | U            | 1           |             |             |             |             |             |               |               |
| 1374 | Control       | None                                                        | Natural    | ASCVD                   | M   | 43  | W    | 21.7 | 6.6 | 1.80      | 7.2 | O               | Y            |             | 1           |             |             |             |             |               |               |
| 505  | MDD           | MDD, recurrent, severe without psychotic features; ADC      | Suicide    | Gunshot                 | M   | 57  | W    | 12.8 | 7.1 | 1.80      | 8.9 | N               | Y            | 1           |             |             |             | 1           |             |               | 1             |
| 513  | MDD           | MDD, recurrent, severe with psychotic features; ODC         | Suicide    | Hanging                 | M   | 24  | W    | 13.1 | 6.9 | 1.90      | 9.0 | N               | Y            | 1           |             |             |             | 1           |             |               | 1             |
| 868  | MDD           | MDD, recurrent, severe without psychotic features; ADC; OAC | Accidental | Trauma                  | M   | 47  | W    | 10.5 | 6.8 | 1.50      | 9.3 | N               | N            | 1           |             |             |             | 1           |             |               | 1             |
| 598  | MDD           | MDD, single episode, severe without psychotic features; OAR | Suicide    | Gunshot                 | M   | 69  | W    | 5.9  | 7.3 | 1.61      | 8.8 | D<br>O          | Y            | 1           |             |             |             | 1           |             |               |               |

| Hu#  | Subject Group | DSM-IV Diagnosis                                            | MOD     | COD                                     | Sex | Age | Race | PMI  | pH  | RNA ratio | RIN | Medication ATOD | Tobacco ATOD | 1-MD1-ACC-M | 2-MD2-ACC-M | 3-MD2-ACC-F | 4-MD3-ACC-F | 5-MD1-AMY-M | 6-MD3-AMY-F | 7-MD2-DLPFC-M | 8-MD2-DLPFC-F |
|------|---------------|-------------------------------------------------------------|---------|-----------------------------------------|-----|-----|------|------|-----|-----------|-----|-----------------|--------------|-------------|-------------|-------------|-------------|-------------|-------------|---------------|---------------|
| 600  | MDD           | MDD, single episode, severe without psychotic features      | Suicide | Hanging                                 | M   | 63  | W    | 9.9  | 6.7 | 1.71      | 7.1 | O               | N            | 1           |             |             |             | 1           |             |               |               |
| 698  | MDD           | MDD, single episode, severe with psychotic features         | Suicide | Hanging                                 | M   | 59  | W    | 13.0 | 6.8 | 1.50      | 9.0 | D<br>O<br>P     | N            | 1           |             |             |             | 1           |             |               |               |
| 783  | MDD           | MDD, recurrent, in full remission                           | Natural | Dissection of the aorta                 | M   | 63  | W    | 11.5 | 6.5 | 1.36      | 8.8 | O               | N            | 1           |             |             |             | 1           |             |               |               |
| 809  | MDD           | MDD, single episode, in full remission                      | Natural | ASCVD                                   | M   | 50  | W    | 20.0 | 6.9 | 1.52      | 8.5 | D<br>O          | Y            | 1           |             |             |             | 1           |             |               |               |
| 863  | MDD           | MDD, single episode, severe without psychotic features      | Natural | ASCVD                                   | M   | 51  | W    | 28.3 | 7.3 | 1.52      | 8.4 | N               | N            | 1           |             |             |             | 1           |             |               |               |
| 926  | MDD           | MDD, single episode, severe without psychotic features; AAR | Natural | Arteriosclerotic and hypertensive heart | M   | 56  | W    | 19.0 | 7.0 | 1.38      | 7.3 | D<br>O          | Y            | 1           |             |             |             | 1           |             |               |               |
| 943  | MDD           | MDD, recurrent, in partial remission; ADC; OAC; ODR         | Suicide | Gunshot                                 | M   | 56  | W    | 15.4 | 6.6 | 1.49      | 8.2 | O               | Y            | 1           |             |             |             | 1           |             |               |               |
| 1001 | MDD           | MDD, single episode, in full remission                      | Natural | Arteriosclerotic and hypertensive heart | M   | 53  | W    | 7.3  | 6.6 | 1.38      | 7.6 | O               | Y            | 1           |             |             |             | 1           |             |               |               |
| 1060 | MDD           | MDD, single episode, in full remission; AAC                 | Suicide | Hanging                                 | M   | 30  | W    | 11.1 | 6.6 | 1.32      | 8.3 | O               | N            | 1           |             |             |             | 1           |             |               |               |



| Hu#  | Subject Group | DSM-IV Diagnosis                                         | MOD        | COD                    | Sex | Age | Race | PMI  | pH  | RNA ratio | RIN | Medication ATOD  | Tobacco ATOD | 1-MD1-ACC-M | 2-MD2-ACC-M | 3-MD2-ACC-F | 4-MD3-ACC-F | 5-MD1-AMY-M | 6-MD3-AMY-F | 7-MD2-DLPFC-M | 8-MD2-DLPFC-F |
|------|---------------|----------------------------------------------------------|------------|------------------------|-----|-----|------|------|-----|-----------|-----|------------------|--------------|-------------|-------------|-------------|-------------|-------------|-------------|---------------|---------------|
| 1049 | MDD           | MDD, single episode, severe without psychotic features   | Natural    | Cardiomyopathy         | M   | 48  | W    | 5.4  | 6.6 | 1.45      | 8.4 | D<br>O           | N            |             |             |             |             | 1           |             |               |               |
| 803  | MDD           | MDD, recurrent, in partial remission                     | Accidental | Trauma                 | F   | 65  | W    | 18.0 | 7.0 | 1.90      | 9.0 | D<br>O           | N            |             |             | 1           |             |             | 1           |               | 1             |
| 934  | MDD           | MDD, recurrent, severe with psychotic features           | Natural    | ASCVD                  | F   | 54  | W    | 17.9 | 6.5 | 1.20      | 8.2 | D<br>O           | N            |             |             | 1           |             |             | 1           |               | 1             |
| 967  | MDD           | MDD, recurrent, moderate; ADC                            | Natural    | ASCVD                  | F   | 40  | W    | 22.2 | 6.6 | 1.6       | 7.4 | N                | Y            |             |             | 1           |             |             | 1           |               | 1             |
| 986  | MDD           | MDD, recurrent, severe without psychotic features        | Natural    | Bronchial asthma       | F   | 53  | W    | 11.9 | 6.7 | 1.80      | 8.8 | D<br>O           | N            |             |             | 1           |             |             | 1           |               | 1             |
| 1041 | MDD           | MDD, recurrent, severe with psychotic features; AAC; ODC | Accidental | Combined drug overdose | F   | 52  | W    | 10.3 | 6.5 | 1.50      | 8.4 | B<br>D<br>O<br>P | Y            |             |             | 1           |             |             | 1           |               | 1             |
| 1157 | MDD           | MDD, recurrent, severe without psychotic features        | Suicide    | Hanging                | F   | 26  | W    | 13.4 | 6.4 | 1.50      | 7.8 | D                | N            |             |             | 1           |             |             | 1           |               | 1             |
| 1190 | MDD           | MDD, recurrent, severe without psychotic features; ADC   | Suicide    | Asphyxiation           | F   | 47  | W    | 22.3 | 6.6 | 1.6       | 8.0 | N                | Y            |             |             | 1           |             |             | 1           |               | 1             |
| 1221 | MDD           | MDD, recurrent, severe without psychotic features        | Natural    | Pulmonary thrombosis   | F   | 28  | B    | 24.8 | 6.6 | 1.8       | 7.2 | N                | N            |             |             | 1           |             |             | 1           |               | 1             |

| Hu#  | Subject Group | DSM-IV Diagnosis                                            | MOD        | COD                    | Sex | Age | Race | PMI  | pH  | RNA ratio | RIN | Medication ATOD  | Tobacco ATOD | 1-MD1-ACC-M | 2-MD2-ACC-M | 3-MD2-ACC-F | 4-MD3-ACC-F | 5-MD1-AMY-M | 6-MD3-AMY-F | 7-MD2-DLPFC-M | 8-MD2-DLPFC-F |
|------|---------------|-------------------------------------------------------------|------------|------------------------|-----|-----|------|------|-----|-----------|-----|------------------|--------------|-------------|-------------|-------------|-------------|-------------|-------------|---------------|---------------|
| 1249 | MDD           | MDD, recurrent, moderate; ODR                               | Accidental | Combined drug overdose | F   | 40  | W    | 11.2 | 6.5 | 2.00      | 9.0 | B<br>C<br>D<br>O | Y            |             |             | 1           |             |             | 1           |               | 1             |
| 1254 | MDD           | MDD, recurrent, severe without psychotic features           | Suicide    | Incised wounds         | F   | 39  | W    | 12.8 | 6.4 | 1.90      | 9.0 | D                | N            |             |             | 1           |             |             | 1           |               | 1             |
| 1408 | MDD           | MDD, recurrent, severe without psychotic features; ADC      | Accidental | Trauma                 | F   | 37  | W    | 15.5 | 6.6 | 1.6       | 7.0 | B<br>D<br>O      | N            |             |             |             | 1           |             | 1           |               | 1             |
| 564  | MDD           | MDD, single episode, severe with psychotic features         | Suicide    | Hanging                | F   | 56  | W    | 16.8 | 7.0 | 1.90      | 9.2 | B<br>D<br>O      | Y            |             |             |             | 1           |             | 1           |               |               |
| 666  | MDD           | MDD, single episode, in partial remission                   | Accidental | Trauma                 | F   | 16  | W    | 10.0 | 7.3 | 2.00      | 9.4 | D                | N            |             |             |             | 1           |             | 1           |               |               |
| 1202 | MDD           | MDD, recurrent, in partial remission                        | Natural    | Pulmonary embolism     | F   | 39  | W    | 11.2 | 6.4 | 1.80      | 8.0 | D<br>O           | Y            |             |             |             | 1           |             | 1           |               |               |
| 1289 | MDD           | MDD, single episode, mild                                   | Natural    | ASCVD                  | F   | 46  | W    | 25.0 | 6.3 | 1.40      | 7.3 | U                | N            |             |             |             | 1           |             | 1           |               |               |
| 1315 | MDD           | MDD, single episode, severe without psychotic features; AAC | Suicide    | Hanging                | F   | 28  | W    | 12.4 | 7.0 | 1.50      | 7.9 | N                | Y            |             |             |             | 1           |             | 1           |               |               |
| 1332 | MDD           | MDD, recurrent, in partial remission; ADR; ODC              | Natural    | ASCVD                  | F   | 46  | W    | 17.5 | 6.7 | 1.60      | 8.9 | B<br>D<br>O      | Y            |             |             |             | 1           |             | 1           |               |               |

| Hu#   | Subject Group | DSM-IV Diagnosis                                            | MOD        | COD                        | Sex | Age | Race | PMI  | pH  | RNA ratio | RIN | Medication ATOD | Tobacco ATOD | 1-MD1-ACC-M | 2-MD2-ACC-M | 3-MD2-ACC-F | 4-MD3-ACC-F | 5-MD1-AMY-M | 6-MD3-AMY-F | 7-MD2-DLFC-M | 8-MD2-DLFC-F |
|-------|---------------|-------------------------------------------------------------|------------|----------------------------|-----|-----|------|------|-----|-----------|-----|-----------------|--------------|-------------|-------------|-------------|-------------|-------------|-------------|--------------|--------------|
| 1356  | MDD           | MDD, recurrent, in partial remission, AAC                   | Accidental | Intraperitoneal hemorrhage | F   | 60  | W    | 20.6 | 6.1 | 1.80      | 8.5 | D<br>O          | N            |             |             |             | 1           |             | 1           |              |              |
| 1360  | MDD           | MDD, single episode, severe without psychotic features; ODC | Suicide    | Drowning                   | F   | 59  | W    | 18.1 | 6.4 | 1.40      | 7.6 | D               | Y            |             |             |             | 1           |             | 1           |              |              |
| 10028 | MDD           | MDD, single episode, severe without psychotic features      | Suicide    | Gunshot                    | F   | 72  | W    | 23.1 | 6.7 | 1.40      | 7.0 | O               | N            |             |             |             | 1           |             | 1           |              |              |
| 613   | MDD           | MDD, recurrent, severe with psychotic features; AAR         | Suicide    | Gunshot                    | M   | 59  | W    | 15.6 | 7.0 | 1.90      | 9.1 | O               | N            | 1           |             |             |             |             |             |              | 1            |
| 1013  | MDD           | MDD, recurrent, severe without psychotic features           | Suicide    | Nail gun wound             | M   | 46  | W    | 16.1 | 6.3 | 1.50      | 8.0 | N               | N            |             | 1           |             |             |             |             |              | 1            |
| 1161  | MDD           | MDD, recurrent, in partial remission, ADR                   | Natural    | ASCVD                      | M   | 57  | W    | 15.9 | 6.6 | 2.00      | 7.6 | D<br>O          | Y            |             | 1           |             |             |             |             |              | 1            |
| 1253  | MDD           | MDD, recurrent, in partial remission; ADC; ODC              | Natural    | ASCVD                      | M   | 58  | W    | 12.5 | 6.8 | 1.90      | 8.1 | C<br>D<br>O     | Y            |             | 1           |             |             |             |             |              | 1            |
| 1261  | MDD           | MDD, recurrent, moderate; ADC; ODC; OAR                     | Accidental | Electrocution              | M   | 46  | W    | 22.8 | 6.6 | 1.90      | 8.8 | D<br>O          | N            |             | 1           |             |             |             |             |              | 1            |
| 1312  | MDD           | MDD, recurrent, severe without psychotic features; ADR; ODC | Accidental | Combined drug overdose     | M   | 51  | W    | 24.6 | 6.5 | 1.60      | 8.5 | O               | N            |             | 1           |             |             |             |             |              | 1            |

| Hu#   | Subject Group | DSM-IV Diagnosis                                            | MOD        | COD                    | Sex | Age | Race | PMI  | pH  | RNA ratio | RIN | Medication ATOD  | Tobacco ATOD | 1-MD1-ACC-M | 2-MD2-ACC-M | 3-MD2-ACC-F | 4-MD3-ACC-F | 5-MD1-AMY-M | 6-MD3-AMY-F | 7-MD2-DLPFC-M | 8-MD2-DLPFC-F |   |   |
|-------|---------------|-------------------------------------------------------------|------------|------------------------|-----|-----|------|------|-----|-----------|-----|------------------|--------------|-------------|-------------|-------------|-------------|-------------|-------------|---------------|---------------|---|---|
| 1320  | MDD           | MDD, recurrent, moderate; ADC                               | Natural    | ASCVD                  | M   | 55  | W    | 24.4 | 6.5 | 1.30      | 7.2 | N                | Y            |             | 1           |             |             |             |             |               | 1             |   |   |
| 10010 | MDD           | MDD, recurrent, severe with psychotic features; AAR         | Suicide    | Amitriptyline overdose | M   | 42  | W    | 14.3 | 6.4 | 1.80      | 7.6 | C<br>D<br>O      | N            |             | 1           |             |             |             |             |               |               | 1 |   |
| 10031 | MDD           | MDD, recurrent, severe without psychotic features; ADC; OAR | Accidental | Combined drug overdose | M   | 36  | W    | 20.0 | 6.8 | 2.00      | 8.9 | C<br>D<br>P      | Y            |             | 1           |             |             |             |             |               |               | 1 |   |
| 1389  | MDD           | MDD, recurrent, severe without psychotic features; ADC      | Natural    | ASCVD                  | M   | 61  | W    | 16.0 | 6.6 | 1.90      | 8.4 | N                | N            |             |             |             |             |             |             |               |               | 1 |   |
| 10012 | MDD           | MDD, recurrent, severe without psychotic features; ODC      | Suicide    | Hanging                | M   | 49  | W    | 24.2 | 6.4 | 1.50      | 8.8 | O                | Y            |             |             |             |             |             |             |               |               | 1 |   |
| 1143  | MDD           | MDD, recurrent, severe without psychotic features; ADR; ODC | Accidental | Combined drug overdose | F   | 49  | W    | 23.4 | 6.4 | 1.80      | 8.1 | B<br>D<br>O      | Y            |             |             | 1           |             |             |             |               |               |   | 1 |
| 565   | MDD           | MDD, recurrent, severe without psychotic features; AAC; ODR | Suicide    | Gunshot                | F   | 62  | W    | 12.5 | 6.9 | 2.00      | 9.2 | D                | N            |             |             | 1           |             |             |             |               |               |   | 1 |
| 1272  | MDD           | MDD, recurrent, unspecified; ADC; ODC                       | Accidental | Asphyxiation           | F   | 64  | W    | 12.1 | 6.6 | 1.40      | 7.8 | B<br>C<br>D<br>O | Y            |             |             | 1           |             |             |             |               |               |   | 1 |

| Hu#  | Subject Group | DSM-IV Diagnosis                                                      | MOD     | COD     | Sex | Age | Race | PMI  | pH  | RNA ratio | RIN | Medication ATOD  | Tobacco ATOD | 1-MD1-ACC-M | 2-MD2-ACC-M | 3-MD2-ACC-F | 4-MD3-ACC-F | 5-MD1-AMY-M | 6-MD3-AMY-F | 7-MD2-DLPFC-M | 8-MD2-DLPFC-F |   |  |
|------|---------------|-----------------------------------------------------------------------|---------|---------|-----|-----|------|------|-----|-----------|-----|------------------|--------------|-------------|-------------|-------------|-------------|-------------|-------------|---------------|---------------|---|--|
| 860  | MDD           | MDD, recurrent; severe with psychotic features                        | Natural | ASCVD   | F   | 74  | W    | 22.8 | 7.0 | 1.20      | 8.1 | B<br>D<br>O<br>P | Y            |             |             | 1           |             |             |             |               |               | 1 |  |
| 619  | MDD           | MDD, severe without psychotic features; ODR                           | Suicide | Gunshot | M   | 55  | W    | 18.8 | 6.9 | 1.33      | 7.9 | B<br>D           | Y            | 1           |             |             |             |             |             |               |               |   |  |
| 1226 | MDD           | MDD, recurrent, severe without psychotic features; ODC; ODR; OAC; OAR | Natural | ASCVD   | M   | 44  | W    | 19.3 | 6.5 | 1.70      | 7.5 | N                | Y            |             | 1           |             |             |             |             |               |               |   |  |

Abbreviations: AAC, alcohol abuse current; AAR, alcohol abuse remission; ADC, alcohol dependence current; ADR, alcohol dependence remission; ASCVD, arteriosclerotic cardiovascular disease; ATOD, at time of death; B, benzodiazepines; B, black subject; C, anticonvulsants; COD, cause of death; COPD, chronic obstructive pulmonary disease; D, antidepressants; F, female; M, male; MDD, major depressive disorder; MOD, mode of death; N, no medications or no tobacco at time of death; O, other medication(s); OAC, other substance abuse current; OAR, other substance abuse remission; ODC, other substance dependence current; ODR, other substance dependence remission; P, antipsychotics; PMI, postmortem interval in hours; RIN, RNA integrity number; W, white subject; Y, yes.

**Table S3. Genes identified via meta-regression which are changed in opposite directions in men and women with MDD.**

| <i>Gene symbol</i> | <i>MetaR</i><br><i>q-value</i> | <i>Men</i>         |                     | <i>Women</i>       |                     |
|--------------------|--------------------------------|--------------------|---------------------|--------------------|---------------------|
|                    |                                | <i>Effect Size</i> | <i>q-value</i>      | <i>Effect Size</i> | <i>q-value</i>      |
| <i>C2CD2L</i>      | < 10 <sup>-29</sup>            | - 1.68             | < 10 <sup>-10</sup> | 1.90               | < 10 <sup>-16</sup> |
| <i>P2RY12</i>      | < 10 <sup>-24</sup>            | 0.92               | < 10 <sup>-4</sup>  | - 2.73             | < 10 <sup>-20</sup> |
| <i>PTPRF</i>       | < 10 <sup>-22</sup>            | - 1.56             | < 10 <sup>-7</sup>  | 1.68               | < 10 <sup>-15</sup> |
| <i>GALC</i>        | < 10 <sup>-22</sup>            | 1.28               | < 10 <sup>-6</sup>  | - 1.41             | < 10 <sup>-13</sup> |
| <i>PCDHB4</i>      | < 10 <sup>-20</sup>            | 1.79               | < 10 <sup>-10</sup> | - 1.26             | < 10 <sup>-11</sup> |
| <i>KLF3</i>        | < 10 <sup>-20</sup>            | 1.65               | < 10 <sup>-8</sup>  | - 2.37             | < 10 <sup>-18</sup> |
| <i>OGFR</i>        | < 10 <sup>-20</sup>            | - 1.89             | < 10 <sup>-8</sup>  | 1.69               | < 10 <sup>-15</sup> |
| <i>PHLDA1</i>      | < 10 <sup>-20</sup>            | 1.48               | < 10 <sup>-9</sup>  | - 1.50             | < 10 <sup>-12</sup> |
| <i>TMEM168</i>     | < 10 <sup>-20</sup>            | 0.86               | < 10 <sup>-3</sup>  | - 1.54             | < 10 <sup>-14</sup> |
| <i>UNC84A</i>      | < 10 <sup>-18</sup>            | - 1.63             | < 10 <sup>-9</sup>  | 0.87               | < 10 <sup>-6</sup>  |
| <i>ADCY3</i>       | < 10 <sup>-17</sup>            | - 1.83             | < 10 <sup>-11</sup> | 0.64               | < 0.05              |
| <i>ZMYND8</i>      | < 10 <sup>-16</sup>            | - 2.42             | < 10 <sup>-13</sup> | 1.74               | < 10 <sup>-6</sup>  |
| <i>RCCD1</i>       | < 10 <sup>-15</sup>            | - 1.27             | < 10 <sup>-6</sup>  | 1.56               | < 10 <sup>-13</sup> |
| <i>CDH3</i>        | < 10 <sup>-13</sup>            | - 1.13             | < 10 <sup>-4</sup>  | 1.41               | < 10 <sup>-12</sup> |
| <i>ARPP21</i>      | < 10 <sup>-13</sup>            | - 2.08             | < 10 <sup>-8</sup>  | 3.19               | < 10 <sup>-6</sup>  |
| <i>GLIPR1</i>      | < 10 <sup>-13</sup>            | 2.04               | < 10 <sup>-11</sup> | - 2.29             | < 10 <sup>-6</sup>  |
| <i>SMAD3</i>       | < 10 <sup>-12</sup>            | - 2.32             | < 10 <sup>-6</sup>  | 1.19               | < 10 <sup>-9</sup>  |
| <i>CCDC86</i>      | < 10 <sup>-12</sup>            | - 0.89             | < 10 <sup>-4</sup>  | 1.08               | < 10 <sup>-8</sup>  |
| <i>IER5L</i>       | < 10 <sup>-12</sup>            | - 2.03             | < 10 <sup>-7</sup>  | 1.26               | < 10 <sup>-9</sup>  |
| <i>MTHFR</i>       | < 10 <sup>-12</sup>            | - 2.01             | < 10 <sup>-4</sup>  | 1.70               | < 10 <sup>-13</sup> |
| <i>SPTBN4</i>      | < 10 <sup>-12</sup>            | - 2.17             | < 10 <sup>-8</sup>  | 2.05               | < 10 <sup>-7</sup>  |
| <i>ADCY9</i>       | < 10 <sup>-11</sup>            | - 1.49             | < 10 <sup>-9</sup>  | 0.89               | < 10 <sup>-4</sup>  |
| <i>KIAA0774</i>    | < 10 <sup>-10</sup>            | - 1.83             | < 10 <sup>-6</sup>  | 1.16               | < 10 <sup>-7</sup>  |
| <i>ICMT</i>        | < 10 <sup>-10</sup>            | - 2.31             | < 10 <sup>-4</sup>  | 1.04               | < 10 <sup>-7</sup>  |
| <i>NEDD4L</i>      | < 10 <sup>-10</sup>            | - 1.72             | < 10 <sup>-10</sup> | 2.19               | < 10 <sup>-3</sup>  |
| <i>OGDHL</i>       | < 10 <sup>-10</sup>            | - 1.15             | < 0.05              | 1.54               | < 10 <sup>-14</sup> |
| <i>KIAA2013</i>    | < 10 <sup>-10</sup>            | - 2.07             | < 10 <sup>-5</sup>  | 1.69               | < 10 <sup>-7</sup>  |
| <i>RNF34</i>       | < 10 <sup>-10</sup>            | - 1.17             | < 10 <sup>-6</sup>  | 1.86               | < 10 <sup>-3</sup>  |
| <i>CPLX2</i>       | < 10 <sup>-10</sup>            | - 1.94             | < 10 <sup>-11</sup> | 1.79               | < 0.05              |
| <i>SCP2</i>        | < 10 <sup>-9</sup>             | 2.08               | < 0.05              | - 1.13             | < 10 <sup>-8</sup>  |
| <i>ZDHHC8</i>      | < 10 <sup>-9</sup>             | - 1.42             | < 10 <sup>-7</sup>  | 1.42               | < 10 <sup>-6</sup>  |
| <i>RBM15</i>       | < 10 <sup>-9</sup>             | - 1.89             | < 10 <sup>-9</sup>  | 1.33               | < 10 <sup>-3</sup>  |
| <i>BCL7B</i>       | < 10 <sup>-9</sup>             | - 2.09             | < 0.05              | 0.66               | < 10 <sup>-3</sup>  |
| <i>ABCB9</i>       | < 10 <sup>-9</sup>             | - 1.78             | < 10 <sup>-6</sup>  | 1.40               | < 10 <sup>-5</sup>  |
| <i>MLF2</i>        | < 10 <sup>-9</sup>             | - 1.71             | < 10 <sup>-9</sup>  | 0.75               | < 0.05              |
| <i>ZBTB46</i>      | < 10 <sup>-9</sup>             | - 1.99             | < 10 <sup>-5</sup>  | 2.09               | < 10 <sup>-3</sup>  |
| <i>GOPC</i>        | < 10 <sup>-9</sup>             | 1.53               | < 10 <sup>-8</sup>  | - 1.44             | < 10 <sup>-4</sup>  |
| <i>ANKRD27</i>     | < 10 <sup>-8</sup>             | - 1.52             | < 10 <sup>-8</sup>  | - 1.33             | < 10 <sup>-3</sup>  |
| <i>EIF5A2</i>      | < 10 <sup>-8</sup>             | - 1.18             | < 10 <sup>-6</sup>  | 1.01               | < 10 <sup>-3</sup>  |
| <i>DNM1</i>        | < 10 <sup>-8</sup>             | - 1.30             | < 10 <sup>-3</sup>  | 1.49               | < 10 <sup>-7</sup>  |
| <i>DARC</i>        | < 10 <sup>-7</sup>             | - 0.82             | < 0.05              | 0.97               | < 10 <sup>-6</sup>  |
| <i>NR2C2</i>       | < 10 <sup>-7</sup>             | - 1.65             | < 10 <sup>-5</sup>  | 1.01               | < 10 <sup>-4</sup>  |
| <i>ADRM1</i>       | < 10 <sup>-7</sup>             | - 1.07             | < 10 <sup>-5</sup>  | 0.90               | < 10 <sup>-3</sup>  |
| <i>DCTN1</i>       | < 10 <sup>-7</sup>             | - 1.50             | < 10 <sup>-3</sup>  | 1.16               | < 10 <sup>-6</sup>  |
| <i>PQLC2</i>       | < 10 <sup>-7</sup>             | - 0.84             | < 10 <sup>-3</sup>  | 1.71               | < 0.05              |
| <i>CYP2B7P1</i>    | < 10 <sup>-6</sup>             | - 0.99             | < 10 <sup>-5</sup>  | 1.16               | < 10 <sup>-3</sup>  |
| <i>PRR7</i>        | < 10 <sup>-6</sup>             | - 1.23             | < 10 <sup>-3</sup>  | 0.64               | < 0.05              |
| <i>DLGAP2</i>      | < 10 <sup>-6</sup>             | - 1.60             | < 0.05              | 1.19               | < 10 <sup>-3</sup>  |
| <i>ELP2</i>        | < 10 <sup>-5</sup>             | - 1.19             | < 0.05              | 0.94               | < 10 <sup>-3</sup>  |
| <i>NUDT17</i>      | < 10 <sup>-5</sup>             | - 0.88             | < 0.05              | 1.07               | < 10 <sup>-3</sup>  |
| <i>SGPP1</i>       | < 10 <sup>-5</sup>             | 1.19               | < 0.05              | - 0.97             | < 10 <sup>-3</sup>  |
| <i>SULT4A1</i>     | < 10 <sup>-5</sup>             | - 0.88             | < 10 <sup>-3</sup>  | 0.82               | < 10 <sup>-3</sup>  |

**Table S4. Overlap in DE genes from male MDD and female MDD with genes that are DE between male and female healthy controls.<sup>a</sup>**

|              | DE genes for meta-regression that are also DE at baseline | DE genes in males with MDD that are also DE at baseline | DE genes in females with MDD that are also DE at baseline | DE genes in opposite directions in male and female MDD that are also DE at baseline |
|--------------|-----------------------------------------------------------|---------------------------------------------------------|-----------------------------------------------------------|-------------------------------------------------------------------------------------|
| <b>ACC</b>   | 10/1027                                                   | 6/706                                                   | 10/882                                                    | 1/52                                                                                |
| <b>DLPFC</b> | 9/1027                                                    | 3/706                                                   | 9/882                                                     | 1/52                                                                                |

<sup>a</sup>For baseline sex difference analysis, a cutoff of  $q < 0.2$  was used to identify genes that were sexually dimorphic in control subjects.

**Table S5. Sex-specific depression changes confirmed using a different brain bank cohort.<sup>a</sup>**

|             | DE genes in women with MDD | DE genes in men with MDD | Overlap of DE genes in men and women with MDD | % genes changed in opposite directions in men and women with MDD |
|-------------|----------------------------|--------------------------|-----------------------------------------------|------------------------------------------------------------------|
| <b>BA11</b> | 3798                       | 3237                     | 299                                           | 61%                                                              |
| <b>BA25</b> | 4331                       | 4776                     | 476                                           | 48%                                                              |

<sup>a</sup>We used recently published publically available RNA-seq data generated using brains from a different brain bank (GEO GSE102556; (6)).  $p < 0.05$  was used as a DE cutoff.

**Table S6. Replication cohort: top 10 transcripts significantly changed in opposite directions in men and women with MDD.**

| Gene symbol            | BA11        |            |             |            | Gene symbol          | BA25        |            |             |            |
|------------------------|-------------|------------|-------------|------------|----------------------|-------------|------------|-------------|------------|
|                        | Men         |            | Women       |            |                      | Men         |            | Women       |            |
|                        | Effect size | p-value    | Effect size | p-value    |                      | Effect size | p-value    | Effect size | p-value    |
| <i>FCGR1C</i>          | -1.840      | $>10^{-4}$ | 1.81        | $>10^{-4}$ | <i>EDAR</i>          | -1.45       | $>0.05$    | 1.48        | $>0.05$    |
| <i>RP11-462G2.2</i>    | -1.18       | $>10^{-3}$ | 2.15        | $>10^{-4}$ | <i>RP11-536O18.2</i> | -1.43       | $>10^{-3}$ | 1.02        | $>0.05$    |
| <i>MYBPH</i>           | -1.14       | $>0.05$    | 1.78        | $>10^{-4}$ | <i>HLA-DOB</i>       | -1.39       | $>0.05$    | 2.12        | $>10^{-3}$ |
| <i>SNORD53_SNORD92</i> | 1.27        | $>10^{-5}$ | -1.64       | $>0.05$    | <i>RP11-370B11.1</i> | -1.37       | $>10^{-3}$ | 1.12        | $>0.05$    |
| <i>AC097721.1</i>      | -1.50       | $>10^{-3}$ | 1.21        | $>0.05$    | <i>KCNE1L</i>        | -1.35       | $>0.05$    | 1.68        | $>0.05$    |
| <i>RPS3AP25</i>        | -0.82       | $>0.05$    | 1.82        | $>10^{-3}$ | <i>AC104088.1</i>    | -1.34       | $>10^{-3}$ | 1.21        | $>10^{-3}$ |
| <i>CD69</i>            | -0.86       | $>0.05$    | 1.67        | $>0.05$    | <i>RP4-660H19.1</i>  | -1.32       | $>0.05$    | 0.80        | $>0.05$    |
| <i>KRT8P13</i>         | -1.00       | $>0.05$    | 1.53        | $>0.05$    | <i>IRX6</i>          | -1.31       | $>0.05$    | 1.38        | $>0.05$    |
| <i>RP11-307C19.3</i>   | 0.79        | $>0.05$    | -1.73       | $>10^{-3}$ | <i>CTD-2623N2.11</i> | -1.24       | $>0.05$    | 1.36        | $>10^{-3}$ |
| <i>RP11-159C21.4</i>   | -1.17       | $>10^{-3}$ | 1.34        | $>0.05$    | <i>AC110754.3</i>    | -1.22       | $>10^{-3}$ | 1.13        | $>0.05$    |

**Table S7. Sex-specific associations of transcriptomic cell-type enriched gene sets using mouse reference dataset.<sup>a</sup>**

| Cell type   | Men     |         | Women              |         |
|-------------|---------|---------|--------------------|---------|
|             | p-value | AUC     | p-value            | AUC     |
| Astro2      | < 0.005 | 0.683 ↑ | NS                 | 0.495   |
| Astro1      | < 0.005 | 0.681 ↑ | NS                 | 0.497   |
| <b>Mgl2</b> | < 0.05  | 0.594 ↑ | < 10 <sup>-4</sup> | 0.377 ↓ |
| S1PyrL4     | < 0.2   | 0.602 ↑ | < 0.005            | 0.602 ↑ |
| Epend       | < 0.01  | 0.612 ↑ | NS                 | 0.518   |
| Oligo5      | < 0.01  | 0.718 ↑ | NS                 | 0.408   |

Abbreviation: AUC, area under the curve. <sup>a</sup>AUC > 0.5 indicates a cell type is enriched in genes that were downregulated in MDD in that sex. AUC < 0.5 indicates a cell type is enriched in genes that were upregulated in MDD in that sex. Bold indicates cell-types affected in opposite directions in men and women with MDD.

**Table S8. Primers used in qPCR studies.**

| Gene          | Forward                                | Reverse                            |
|---------------|----------------------------------------|------------------------------------|
| <i>ARPP21</i> | 5' TAC CAC CGG CAC TTA<br>CAA 3'       | 5' GGG AAG CGA TAC AAT<br>CCA 3'   |
| <i>P2RY12</i> | 5' GTG TCA AGT TAC CTC<br>CGT CAT A 3' | 5' TAA ATG GCC TGG TGG<br>TCT 3'   |
| <i>MTHFR</i>  | 5' TTG TGT TTG GTT TGG<br>TGG T 3'     | 5' CAT CGG TCA GTC CCT<br>CTC 3'   |
| <i>GAPDH</i>  | 5' TGC ACC ACC AAC TGC<br>TTA GC 3'    | 5' GGC ATG GAC TGT GGT<br>CAT G 3' |
| <i>CYCLO</i>  | 5' GCA GAC AAG GTC CCA<br>AAG 3'       | 5' GAA GTC ACC ACC CTG<br>ACA C 3' |



## Supplemental References

1. Wang, X, Lin, Y, Song, C, Sibille, E, and Tseng, GC, (2012): Detecting disease-associated genes with confounding variable adjustment and the impact on genomic meta-analysis: with application to major depressive disorder. *BMC Bioinformatics* 13: 52.
2. Benjamini, Y and Hochberg, Y, (1995): Controlling the False Discovery Rate - a Practical and Powerful Approach to Multiple Testing. *Journal of the Royal Statistical Society Series B-Methodological* 57: 289-300.
3. Schwarz, GE, (1978): Estimating the dimension of a model. *Annals of Statistics* 6: 461-464.
4. Choi, JK, Yu, U, Kim, S, and Yoo, OJ, (2003): Combining multiple microarray studies and modeling interstudy variation. *Bioinformatics* 19: i84-90.
5. DerSimonian, R and Laird, N, (1986): Meta-analysis in clinical trials. *Control Clin Trials* 7: 177-88.
6. Labonte, B, Engmann, O, Purushothaman, I, Menard, C, Wang, J, Tan, C, et al., (2017): Sex-specific transcriptional signatures in human depression. *Nat Med* 23: 1102-1111.
7. Hashimoto, R, Straub, RE, Weickert, CS, Hyde, TM, Kleinman, JE, and Weinberger, DR, (2004): Expression analysis of neuregulin-1 in the dorsolateral prefrontal cortex in schizophrenia. *Mol Psychiatry* 9: 299-307.
8. Benjamini, Y, Drai, D, Elmer, G, Kafkafi, N, and Golani, I, (2001): Controlling the false discovery rate in behavior genetics research. *Behav Brain Res* 125: 279-84.
9. Plaisier, SB, Taschereau, R, Wong, JA, and Graeber, TG, (2010): Rank-rank hypergeometric overlap: identification of statistically significant overlap between gene-expression signatures. *Nucleic Acids Res* 38: e169.
10. Zeisel, A, Munoz-Manchado, AB, Codeluppi, S, Lonnerberg, P, La Manno, G, Jureus, A, et al., (2015): Brain structure. Cell types in the mouse cortex and hippocampus revealed by single-cell RNA-seq. *Science* 347: 1138-42.
11. Chang, LC, Jamain, S, Lin, CW, Rujescu, D, Tseng, GC, and Sibille, E, (2014): A Conserved BDNF, Glutamate- and GABA-Enriched Gene Module Related to Human Depression Identified by Coexpression Meta-Analysis and DNA Variant Genome-Wide Association Studies. *PLoS One* 9: e90980.
12. Sibille, E, Wang, Y, Joeyen-Waldorf, J, Gaiteri, C, Surget, A, Oh, S, et al., (2009): A molecular signature of depression in the amygdala. *Am.J.Psychiatry* 166: 1011-1024.

13. Sibille, E, Arango, V, Galfalvy, HC, Pavlidis, P, Erraji-Benchekroun, L, Ellis, SP, et al., (2004): Gene expression profiling of depression and suicide in human prefrontal cortex. *Neuropsychopharmacology* 29: 351-61.
14. Guilloux, JP, Douillard-Guilloux, G, Kota, R, Wang, X, Gardier, AM, Martinowich, K, et al., (2012): Molecular evidence for BDNF- and GABA-related dysfunctions in the amygdala of female subjects with major depression. *Mol Psychiatry* 17: 1130-42.
